# Supplementary material for: Barriers and Facilitators to the Implementation of Effective Alcohol Control Policies: A Scoping Review
Source: MDPI journal article supplement (doi:10.3390/ijerph19116742), 2022-05-31
Supplement: s1 [file s1]

## Supplementary

**Table S1:** Search terms across different databases

| Search terms                                                                                                                                                                                                                                                                                                                                                                                                                                                                                                                                                                                                                                                                                                                                                                                                                                                                                                                                                                                                                                                                                                                                                                                                                                                                                                                                                                                                                                                                                                                        | Number of studies found |
|-------------------------------------------------------------------------------------------------------------------------------------------------------------------------------------------------------------------------------------------------------------------------------------------------------------------------------------------------------------------------------------------------------------------------------------------------------------------------------------------------------------------------------------------------------------------------------------------------------------------------------------------------------------------------------------------------------------------------------------------------------------------------------------------------------------------------------------------------------------------------------------------------------------------------------------------------------------------------------------------------------------------------------------------------------------------------------------------------------------------------------------------------------------------------------------------------------------------------------------------------------------------------------------------------------------------------------------------------------------------------------------------------------------------------------------------------------------------------------------------------------------------------------------|-------------------------|
| Scopus                                                                                                                                                                                                                                                                                                                                                                                                                                                                                                                                                                                                                                                                                                                                                                                                                                                                                                                                                                                                                                                                                                                                                                                                                                                                                                                                                                                                                                                                                                                              |                         |
| (( TITLE-ABS ( alcohol* W/10 polic* )) AND ( TITLE-ABS-KEY( implement* OR enforc* OR monitor* OR compliance ))) OR (( TITLE-ABS ( alcohol* W/10 regulat* )) AND ( TITLE-ABS-KEY( implement* OR enforc* OR monitor* OR compliance ))) OR (( TITLE-ABS ( alcohol* W/10 strateg* )) AND ( TITLE-ABS-KEY( implement* OR enforc* OR monitor* OR compliance ))) OR (( TITLE-ABS ( alcohol* W/10 law* )) AND ( TITLE-ABS-KEY( implement* OR enforc* OR monitor* OR compliance ))) OR (( TITLE-ABS ( alcohol* W/10 legislation ) ) AND ( TITLE-ABS-KEY( implement* OR enforc* OR monitor* OR compliance ))) AND NOT (TITLE-ABS ("non-alcohol*" OR "brief screening" OR screening OR "alcohol treatment" )) AND NOT SUBJAREA ( vete ) AND ( LIMIT-TO ( PUBYEAR , 2021 ) OR LIMIT-TO ( PUBYEAR , 2020 ) OR LIMIT-TO ( PUBYEAR , 2019 ) OR LIMIT-TO ( PUBYEAR , 2018 ) OR LIMIT-TO ( PUBYEAR , 2017 ) OR LIMIT-TO ( PUBYEAR , 2016 ) OR LIMIT-TO ( PUBYEAR , 2015 ) OR LIMIT-TO ( PUBYEAR , 2014 ) OR LIMIT-TO ( PUBYEAR , 2013 ) OR LIMIT-TO ( PUBYEAR , 2012 ) OR LIMIT-TO ( PUBYEAR , 2011 ) OR LIMIT-TO ( PUBYEAR , 2010 ) OR LIMIT-TO ( PUBYEAR , 2009 ) OR LIMIT-TO ( PUBYEAR , 2008 ) OR LIMIT-TO ( PUBYEAR , 2007 ) OR LIMIT-TO ( PUBYEAR , 2006 ) OR LIMIT-TO ( PUBYEAR , 2005 ) OR LIMIT-TO ( PUBYEAR , 2004 ) OR LIMIT-TO ( PUBYEAR , 2003 ) OR LIMIT-TO ( PUBYEAR , 2002 ) OR LIMIT-TO ( PUBYEAR , 2001 ) OR LIMIT-TO ( PUBYEAR , 2000 )) AND ( LIMIT-TO ( DOCTYPE , "ar" ) OR LIMIT-TO ( DOCTYPE , "re" ) OR LIMIT-TO ( DOCTYPE , | 1904                    |

| Search terms                                                                                                                                                                                                                                                                                                                                                                                                                                                                                                                                                                                                                                                                                                                                                                                                                                                                                                                                                                                                                                                                                                                                                                                                           | Number of studies found |
|------------------------------------------------------------------------------------------------------------------------------------------------------------------------------------------------------------------------------------------------------------------------------------------------------------------------------------------------------------------------------------------------------------------------------------------------------------------------------------------------------------------------------------------------------------------------------------------------------------------------------------------------------------------------------------------------------------------------------------------------------------------------------------------------------------------------------------------------------------------------------------------------------------------------------------------------------------------------------------------------------------------------------------------------------------------------------------------------------------------------------------------------------------------------------------------------------------------------|-------------------------|
| "cp" ) OR LIMIT-TO ( DOCTYPE , "sh" ) ) AND ( LIMIT-TO ( LANGUAGE , "English" ) )                                                                                                                                                                                                                                                                                                                                                                                                                                                                                                                                                                                                                                                                                                                                                                                                                                                                                                                                                                                                                                                                                                                                      |                         |
| ( TITLE-ABS ( taxes OR tax OR taxation OR pric* OR affordability OR "minimum pricing" OR "minimum unit pricing" OR "floor price" ) ) AND ( TITLE-ABS ( alcohol* ) ) AND ( TITLE-ABS-KEY( implement* OR enforc* OR monitor* OR compliance)) AND NOT "non-alcohol*" AND NOT SUBJAREA ( vete ) AND ( LIMIT-TO ( PUBYEAR , 2021 ) OR LIMIT-TO ( PUBYEAR , 2020 ) OR LIMIT-TO ( PUBYEAR , 2019 ) OR LIMIT-TO ( PUBYEAR , 2018 ) OR LIMIT-TO ( PUBYEAR , 2017 ) OR LIMIT-TO ( PUBYEAR , 2016 ) OR LIMIT-TO ( PUBYEAR , 2015 ) OR LIMIT-TO ( PUBYEAR , 2014 ) OR LIMIT-TO ( PUBYEAR , 2013 ) OR LIMIT-TO ( PUBYEAR , 2012 ) OR LIMIT-TO ( PUBYEAR , 2011 ) OR LIMIT-TO ( PUBYEAR , 2010 ) OR LIMIT-TO ( PUBYEAR , 2009 ) OR LIMIT-TO ( PUBYEAR , 2008 ) OR LIMIT-TO ( PUBYEAR , 2007 ) OR LIMIT-TO ( PUBYEAR , 2006 ) OR LIMIT-TO ( PUBYEAR , 2005 ) OR LIMIT-TO ( PUBYEAR , 2004 ) OR LIMIT-TO ( PUBYEAR , 2003 ) OR LIMIT-TO ( PUBYEAR , 2002 ) OR LIMIT-TO ( PUBYEAR , 2001 ) OR LIMIT-TO ( PUBYEAR , 2000 ) ) AND ( LIMIT-TO ( DOCTYPE , "ar" ) OR LIMIT-TO ( DOCTYPE , "re" ) OR LIMIT-TO ( DOCTYPE , "cp" ) OR LIMIT-TO ( DOCTYPE , "bz" ) OR LIMIT-TO ( DOCTYPE , "sh" ) ) AND ( LIMIT-TO ( LANGUAGE , "English" ) ) ) | 407                     |
| ( TITLE-ABS ( sale* OR “trading hour*” OR “intoxicat*” OR "on-premis*" OR "off-premis*" OR "minimum age" OR "minimum legal age" OR availabilit* OR retail* OR outlet* OR licen* OR "online deliver*" OR "online sale*" ) ) AND ( TITLE-ABS ( alcohol* ) ) AND ( TITLE-ABS-KEY( implement* OR enforc* OR monitor* OR compliance ) ) AND NOT "non-alcohol*" AND NOT SUBJAREA ( vete ) AND ( LIMIT-TO ( PUBYEAR , 2021 ) OR                                                                                                                                                                                                                                                                                                                                                                                                                                                                                                                                                                                                                                                                                                                                                                                               | 2,189                   |

| Search terms                                                                                                                                                                                                                                                                                                                                                                                                                                                                                                                                                                                                                                                                                                                                                                                                                                                                                                               | Number of studies found |
|----------------------------------------------------------------------------------------------------------------------------------------------------------------------------------------------------------------------------------------------------------------------------------------------------------------------------------------------------------------------------------------------------------------------------------------------------------------------------------------------------------------------------------------------------------------------------------------------------------------------------------------------------------------------------------------------------------------------------------------------------------------------------------------------------------------------------------------------------------------------------------------------------------------------------|-------------------------|
| LIMIT-TO ( PUBYEAR , 2020 ) OR LIMIT-TO ( PUBYEAR , 2019 ) OR<br>LIMIT-TO ( PUBYEAR , 2018 ) OR LIMIT-TO ( PUBYEAR , 2017 ) OR<br>LIMIT-TO ( PUBYEAR , 2016 ) OR LIMIT-TO ( PUBYEAR , 2015 ) OR<br>LIMIT-TO ( PUBYEAR , 2014 ) OR LIMIT-TO ( PUBYEAR , 2013 ) OR<br>LIMIT-TO ( PUBYEAR , 2012 ) OR LIMIT-TO ( PUBYEAR , 2011 ) OR<br>LIMIT-TO ( PUBYEAR , 2010 ) OR LIMIT-TO ( PUBYEAR , 2009 ) OR<br>LIMIT-TO ( PUBYEAR , 2008 ) OR LIMIT-TO ( PUBYEAR , 2007 ) OR<br>LIMIT-TO ( PUBYEAR , 2006 ) OR LIMIT-TO ( PUBYEAR , 2005 ) OR<br>LIMIT-TO ( PUBYEAR , 2004 ) OR LIMIT-TO ( PUBYEAR , 2003 ) OR<br>LIMIT-TO ( PUBYEAR , 2002 ) OR LIMIT-TO ( PUBYEAR , 2001 ) OR<br>LIMIT-TO ( PUBYEAR , 2000 ) ) AND ( LIMIT-TO ( DOCTYPE , "ar" )<br>OR LIMIT-TO ( DOCTYPE , "re" ) OR LIMIT-TO ( DOCTYPE , "cp" ) OR<br>LIMIT-TO ( DOCTYPE , "sh" ) OR LIMIT-TO ( DOCTYPE , "bz" ) ) AND<br>( LIMIT-TO ( LANGUAGE , "English" ) ) |                         |
| ( TITLE-ABS ( marketing OR promot* OR adverti* OR sponsor* ) ) AND ( TITLE-ABS ( alcohol* ) ) AND ( TITLE-ABS-KEY( implement* OR enforc* OR monitor* OR compliance ) ) AND NOT "non-alcohol*" AND NOT SUBJAREA ( vete ) AND ( LIMIT-TO ( PUBYEAR , 2021 ) OR LIMIT-TO ( PUBYEAR , 2020 ) OR LIMIT-TO ( PUBYEAR , 2019 ) OR LIMIT-TO ( PUBYEAR , 2018 ) OR LIMIT-TO ( PUBYEAR , 2017 ) OR LIMIT-TO ( PUBYEAR , 2016 ) OR LIMIT-TO ( PUBYEAR , 2015 ) OR LIMIT-TO ( PUBYEAR , 2014 ) OR LIMIT-TO ( PUBYEAR , 2013 ) OR LIMIT-TO ( PUBYEAR , 2012 ) OR LIMIT-TO ( PUBYEAR , 2011 ) OR LIMIT-TO ( PUBYEAR , 2010 ) OR LIMIT-TO ( PUBYEAR , 2009 ) OR LIMIT-TO ( PUBYEAR , 2008 ) OR LIMIT-TO ( PUBYEAR , 2007 ) OR LIMIT-TO ( PUBYEAR , 2006 ) OR LIMIT-TO ( PUBYEAR , 2005 ) OR LIMIT-TO ( PUBYEAR , 2004 ) OR LIMIT-TO ( PUBYEAR , 2003 ) OR LIMIT-TO (                                                                      | 1,982                   |

| Search terms                                                                                                                                                                                                                                                                                                                                                                                                                                                                                                                                                                                                                                                                                                                                                                                                                                                                                                                                                                                                                                                                                                 | Number of studies found |
|--------------------------------------------------------------------------------------------------------------------------------------------------------------------------------------------------------------------------------------------------------------------------------------------------------------------------------------------------------------------------------------------------------------------------------------------------------------------------------------------------------------------------------------------------------------------------------------------------------------------------------------------------------------------------------------------------------------------------------------------------------------------------------------------------------------------------------------------------------------------------------------------------------------------------------------------------------------------------------------------------------------------------------------------------------------------------------------------------------------|-------------------------|
| PUBYEAR , 2002 ) OR LIMIT-TO ( PUBYEAR , 2001 ) OR LIMIT-TO ( PUBYEAR , 2000 ) ) AND ( LIMIT-TO ( DOCTYPE , "ar" ) OR LIMIT-TO ( DOCTYPE , "re" ) OR LIMIT-TO ( DOCTYPE , "cp" ) OR LIMIT-TO ( DOCTYPE , "sh" ) OR LIMIT-TO ( DOCTYPE , "bz" ) ) AND ( LIMIT-TO ( LANGUAGE , "English" ) )                                                                                                                                                                                                                                                                                                                                                                                                                                                                                                                                                                                                                                                                                                                                                                                                                   |                         |
| ( TITLE-ABS ( driv* OR “blood alcohol concentration” ) ) AND ( TITLE-ABS ( alcohol* ) ) AND ( TITLE-ABS-KEY ( implement* OR enforc* OR monitor* OR compliance ) ) AND NOT "non-alcohol*" AND NOT SUBJAREA ( vete ) AND ( LIMIT-TO ( PUBYEAR , 2021 ) OR LIMIT-TO ( PUBYEAR , 2020 ) OR LIMIT-TO ( PUBYEAR , 2019 ) OR LIMIT-TO ( PUBYEAR , 2018 ) OR LIMIT-TO ( PUBYEAR , 2017 ) OR LIMIT-TO ( PUBYEAR , 2016 ) OR LIMIT-TO ( PUBYEAR , 2015 ) OR LIMIT-TO ( PUBYEAR , 2014 ) OR LIMIT-TO ( PUBYEAR , 2013 ) OR LIMIT-TO ( PUBYEAR , 2012 ) OR LIMIT-TO ( PUBYEAR , 2011 ) OR LIMIT-TO ( PUBYEAR , 2010 ) OR LIMIT-TO ( PUBYEAR , 2009 ) OR LIMIT-TO ( PUBYEAR , 2008 ) OR LIMIT-TO ( PUBYEAR , 2007 ) OR LIMIT-TO ( PUBYEAR , 2006 ) OR LIMIT-TO ( PUBYEAR , 2005 ) OR LIMIT-TO ( PUBYEAR , 2004 ) OR LIMIT-TO ( PUBYEAR , 2003 ) OR LIMIT-TO ( PUBYEAR , 2002 ) OR LIMIT-TO ( PUBYEAR , 2001 ) OR LIMIT-TO ( PUBYEAR , 2000 ) ) AND ( LIMIT-TO ( DOCTYPE , "ar" ) OR LIMIT-TO ( DOCTYPE , "re" ) OR LIMIT-TO ( DOCTYPE , "cp" ) OR LIMIT-TO ( DOCTYPE , "sh" ) ) AND ( LIMIT-TO ( LANGUAGE , "English" ) ) | 1,778                   |
| (( ( TITLE-ABS ( alcohol* W/10 polic* ) ) AND ( TITLE-ABS-KEY ( implement* OR enforc* OR monitor* OR compliance ) ) ) OR ( ( TITLE-ABS ( alcohol* W/10 regulat* ) ) AND ( TITLE-ABS-KEY ( implement* OR enforc* OR monitor* OR compliance ) ) ) OR ( ( TITLE-ABS ( alcohol* W/10 strateg* ) ) AND ( TITLE-ABS-KEY ( implement* OR enforc* OR                                                                                                                                                                                                                                                                                                                                                                                                                                                                                                                                                                                                                                                                                                                                                                 | 6,102                   |

| Search terms                                                                                                                                                                                                                                                                                                                                                                                                                                                                                                                                                                                                                                                                                                                                                                                                                                                                                                                                                                                                                                                                                                                                                                                                                                                                                                                                                                                                                                                                                                                                                                                                                                                                                                                                                                                                                                                                                          | Number of studies found |
|-------------------------------------------------------------------------------------------------------------------------------------------------------------------------------------------------------------------------------------------------------------------------------------------------------------------------------------------------------------------------------------------------------------------------------------------------------------------------------------------------------------------------------------------------------------------------------------------------------------------------------------------------------------------------------------------------------------------------------------------------------------------------------------------------------------------------------------------------------------------------------------------------------------------------------------------------------------------------------------------------------------------------------------------------------------------------------------------------------------------------------------------------------------------------------------------------------------------------------------------------------------------------------------------------------------------------------------------------------------------------------------------------------------------------------------------------------------------------------------------------------------------------------------------------------------------------------------------------------------------------------------------------------------------------------------------------------------------------------------------------------------------------------------------------------------------------------------------------------------------------------------------------------|-------------------------|
| <p>monitor* OR compliance))) OR (( TITLE-ABS ( alcohol* W/10 law* )) AND ( TITLE-ABS-KEY ( implement* OR enforc* OR monitor* OR compliance ))) OR (( TITLE-ABS ( alcohol* W/10 legislation )) AND ( TITLE-ABS-KEY ( implement* OR enforc* OR monitor* OR compliance )) ) AND NOT ( TITLE-ABS ( "non-alcohol*" OR "brief screening" OR screening OR "alcohol treatment" )) AND NOT SUBJAREA ( vete )) OR (( TITLE-ABS ( taxes OR tax OR taxation OR pric* OR affordability OR "minimum pricing" OR "minimum unit pricing" OR "floor price" )) AND ( TITLE-ABS ( alcohol* )) AND ( TITLE-ABS-KEY ( implement* OR enforc* OR monitor* OR compliance )) AND NOT "non-alcohol*" AND NOT SUBJAREA ( vete )) OR (( TITLE-ABS ( sale* OR "trading hour*" OR "intoxicat*" OR "on-premis*" OR "off-premis*" OR "minimum age" OR "minimum legal age" OR availabilit* OR retail* OR outlet* OR licen* OR "online deliver*" OR "online sale*" )) AND ( TITLE-ABS ( alcohol* )) AND ( TITLE-ABS-KEY ( implement* OR enforc* OR monitor* OR compliance )) AND NOT "non-alcohol*" AND NOT SUBJAREA ( vete )) OR (( TITLE-ABS ( marketing OR promot* OR adverti* OR sponsor* )) AND ( TITLE-ABS ( alcohol* )) AND ( TITLE-ABS-KEY ( implement* OR enforc* OR monitor* OR compliance )) AND NOT "non-alcohol*" AND NOT SUBJAREA ( vete )) OR (( TITLE-ABS ( driv* OR "blood alcohol concentration" )) AND ( TITLE-ABS ( alcohol* )) AND ( TITLE-ABS-KEY ( implement* OR enforc* OR monitor* OR compliance )) AND NOT "non-alcohol*" AND NOT SUBJAREA ( vete )) AND ( LIMIT-TO ( LANGUAGE , "English" )) AND ( LIMIT-TO ( DOCTYPE , "ar" ) OR LIMIT-TO ( DOCTYPE , "re" ) OR LIMIT-TO ( DOCTYPE , "cp" ) OR LIMIT-TO ( DOCTYPE , "sh" ) OR LIMIT-TO ( DOCTYPE , "bz" )) AND ( LIMIT-TO ( PUBYEAR , 2021 ) OR LIMIT-TO ( PUBYEAR , 2020 ) OR LIMIT-TO ( PUBYEAR , 2019 ) OR LIMIT-TO ( PUBYEAR , 2018 ) OR LIMIT-TO (</p> |                         |

| Search terms                                                                                                                                                                                                                                                                                                                                                                                                                                                                                                                                                      | Number of studies found |
|-------------------------------------------------------------------------------------------------------------------------------------------------------------------------------------------------------------------------------------------------------------------------------------------------------------------------------------------------------------------------------------------------------------------------------------------------------------------------------------------------------------------------------------------------------------------|-------------------------|
| PUBYEAR , 2017 ) OR LIMIT-TO ( PUBYEAR , 2016 ) OR LIMIT-TO ( PUBYEAR , 2015 ) OR LIMIT-TO ( PUBYEAR , 2014 ) OR LIMIT-TO ( PUBYEAR , 2013 ) OR LIMIT-TO ( PUBYEAR , 2012 ) OR LIMIT-TO ( PUBYEAR , 2011 ) OR LIMIT-TO ( PUBYEAR , 2010 ) OR LIMIT-TO ( PUBYEAR , 2009 ) OR LIMIT-TO ( PUBYEAR , 2008 ) OR LIMIT-TO ( PUBYEAR , 2007 ) OR LIMIT-TO ( PUBYEAR , 2006 ) OR LIMIT-TO ( PUBYEAR , 2005 ) OR LIMIT-TO ( PUBYEAR , 2004 ) OR LIMIT-TO ( PUBYEAR , 2003 ) OR LIMIT-TO ( PUBYEAR , 2002 ) OR LIMIT-TO ( PUBYEAR , 2001 ) OR LIMIT-TO ( PUBYEAR , 2000 ) ) |                         |
| Web of Science                                                                                                                                                                                                                                                                                                                                                                                                                                                                                                                                                    |                         |
| ((AB=(alcohol* NEAR polic*) AND AB=(implement* OR enforc* OR monitor* OR compliance)) OR (AB=(alcohol* NEAR regulat*) AND AB=(implement* OR enforc* OR monitor* OR compliance)) OR (AB=(alcohol* NEAR strateg*) AND AB=(implement* OR enforc* OR monitor* OR compliance)) OR (AB=(alcohol* NEAR law*) AND AB=(implement* OR enforc* OR monitor* OR compliance)) OR (AB=(alcohol* NEAR legislation) AND AB=(implement* OR enforc* OR monitor* OR compliance))) NOT (AB=("non-alcohol*" OR "brief screening" OR screening OR "alcohol treatment")) NOT SU= Zoology  | 2,656                   |
| AB=(taxes OR tax OR taxation OR pric* OR affordability OR "minimum pricing" OR "minimum unit pricing" OR "floor price") AND AB=( alcohol* ) AND AB=( implement* OR enforc* OR monitor* OR compliance ) NOT AB="non-alcohol*" NOT SU= Zoology                                                                                                                                                                                                                                                                                                                      | 567                     |
| AB=( sale* OR "trading hour*" OR "intoxicat*" OR "on-premis*" OR "off-premis*" OR "minimum age" OR "minimum legal age" OR availabilit* OR retail* OR outlet* OR licen* OR "online deliver*" OR "online sale*")                                                                                                                                                                                                                                                                                                                                                    | 2410                    |

| Search terms                                                                                                                                                                                                                                                                                                                                                                                              | Number of studies found |
|-----------------------------------------------------------------------------------------------------------------------------------------------------------------------------------------------------------------------------------------------------------------------------------------------------------------------------------------------------------------------------------------------------------|-------------------------|
| AND AB=( alcohol* ) AND AB=( implement* OR enforc* OR monitor* OR compliance ) NOT AB= “non-alcohol*” NOT SU= Zoology                                                                                                                                                                                                                                                                                     |                         |
| AB=( marketing OR promot* OR adverti* OR sponsor*) AND AB=( alcohol*) AND AB=( implement* OR enforc* OR monitor* OR compliance) NOT AB="non-alcohol*" NOT SU= Zoology                                                                                                                                                                                                                                     | 2,687                   |
| AB=( driv* OR “blood alcohol concentration” ) AND AB=( alcohol* ) AND AB=( implement* OR enforc* OR monitor* OR compliance ) NOT AB= "non-alcohol*" NOT SU= Zoology                                                                                                                                                                                                                                       | 1889                    |
| Combined with all<br>#5 OR #4 OR #3 OR #2 OR #1<br>Refined by: PUBLICATION YEARS: ( 2021 OR 2005 OR 2020 OR 2004 OR 2019 OR 2003 OR 2018 OR 2002 OR 2017 OR 2001 OR 2016 OR 2000 OR 2015 OR 2014 OR 2013 OR 2012 OR 2011 OR 2010 OR 2009 OR 2008 OR 2007 OR 2006 ) AND DOCUMENT TYPES: ( ARTICLE OR REPORT OR REVIEW OR THESIS DISSERTATION OR CASE REPORT OR CLINICAL TRIAL ) AND LANGUAGES: ( ENGLISH ) | 5,549                   |
